# Supplementary material for: Integration of transcriptomics and metabonomics revealed the protective effects of hemp seed oil against methionine–choline-deficient diet-induced non-alcoholic steatohepatitis in mice
Source: Royal Society of Chemistry journal article supplement (doi:10.1039/d2fo03054c), 2023-01-01
Supplement: d2fo03054c1.pdf [file d2fo03054c1.pdf]

**Integration of transcriptomics and metabonomics revealed the protective effects of hemp seed oil against methionine-choline-deficient diet-induced non-alcoholic steatohepatitis in mice**

Mengjuan Gong, Hailong Lu, Lixi Li, Meiqi Feng, Zhongjie Zou\*

School of Chinese Materia Medica, Guangdong Pharmaceutical University, Guangzhou  
510006, China

\*Corresponding author: School of Traditional Chinese Medicine, Guangdong  
Pharmaceutical University, Guangzhou, People's Republic of China. Tel: +86 20  
39353240; Fax: +86 20 39352174; E-mail address: zouzhongjie@139.com.

## Determination of the fatty acid profile of hemp seed oil

The fatty acid profile was determined by a gas chromatography (GC) procedure after methylation with cold methanolic solution of potassium hydroxide. The fatty acid methyl esters (FAMES) were analyzed in an Agilent 8890 gas chromatography equipped with a flame ionization detector (FID), using a TR-FAME GC Column (100 m × 0.25 mm, film thickness 0.2 μm, Thermo Fisher Scientific, Waltham, MA, USA). The initial column temperature was 100 °C, which was held for 13 min and programmed at 10 °C/min from 100 to 180 °C, which was held for 6 min, and then programmed at 1 °C/min from 180 to 200 °C, which was held for 18 min, and finally programmed at 2 °C/min from 200 to 230 °C, which was held for 5 min. The injector temperature was 270 °C, and the detector temperature was 280 °C. FAMES were identified by retention time comparison to that of the corresponding standard peaks.

**Table S1** Primer sequences for qRT-PCR

| Gene            | Forward                       | Reverse                |
|-----------------|-------------------------------|------------------------|
| Gls1            | GCAAGTTCTTGCTGGAGACTCTCA<br>T | AGTTGTCCCCAACGTCATGGGC |
| Glud1           | GGAGATGTCCTGGATCGCTG          | AGAGTGCAGGCCACATTAC    |
| Gpt2            | CATTGGGGATGCCCATGCTA          | GCACTGTAAGATCCCAAGCTG  |
| Col1 $\alpha$ 1 | GAGCGGAGAGTACTGGATCG          | GCTTCTTTTCCTTGGGGTTC   |
| TGF $\beta$ 1   | TGAGTGGCTGTCTTTTGACG          | TCTCTGTGGAGCTGAAGCAA   |
| GAPDH           | CCTCGTCCCGTAGACAAAATG         | TGAGGTCAATGAAGGGGTCGT  |

**Table S2** Fatty acid compositions of hemp seed oil

| Fatty acids                                     | Content (g/100 g) | Fatty acids                                     | Content (g/100 g) |
|-------------------------------------------------|-------------------|-------------------------------------------------|-------------------|
| linoleic acid (18:2,<br>$\omega$ -6)            | 58.7              | $\gamma$ -linolenic acid<br>(18:3, $\omega$ -6) | 0.43              |
| $\alpha$ -linolenic acid<br>(18:3, $\omega$ -3) | 16.1              | Palmitoleic acid<br>(16:1)                      | 0.0914            |
| oleic acid (18:1)                               | 14.1              | Margaric acid<br>(17:0)                         | 0.048             |
| palmitic acid<br>(16:0)                         | 7.53              | Myristic acid<br>(14:0)                         | 0.0326            |
| stearic acid (18:0)                             | 2.94              |                                                 |                   |
